# Supplementary material for: Structure of the human lipid-gated cation channel TRPC3
Source: eLife journal article supplement (doi:10.7554/elife.36852), 2018-05-04
Supplement: supp [file elife-36852-supp-v1.zip]

Archive with 6 entries (6 files):
- elife_poa_e36852_Figure_1_figure_supplement_3.pdf
- elife_poa_e36852_Figure_1_figure_supplement_2.pdf
- elife_poa_e36852_Transparent_Reporting_File.docx
- elife_poa_e36852_Figure_1_figure_supplement_1.pdf
- elife_poa_e36852_Figure_3_figure_supplement_1.pdf
- elife_poa_e36852_Figure_1_figure_supplement_4.pdf
