# Supplementary material for: Structure of the human lipid-gated cation channel TRPC3
Source: eLife journal article supplement (doi:10.7554/elife.36852), 2018-05-04
Supplement: supp [file elife-36852-supp-v1.zip › elife_poa_e36852_Figure_1_figure_supplement_4.pdf]

Figure 1 – figure supplement 4

|             |      |                                                                                                                                                                              |      |
|-------------|------|------------------------------------------------------------------------------------------------------------------------------------------------------------------------------|------|
| Human_TRPC3 | 1    | -----MREKGRRAVRGPAFMFNDGRGSLTAEERFLDAAEYGNIPVVRKMLEE                                                                                                                         | 49   |
| Human_TRPC6 | 56   | C FRGS-----DNRLAHRRTVLRKGRRLANRGPAYMFSDRSTSLSEEEERFLDAAEYGNIPVVRKMLEE                                                                                                        | 120  |
| Human_TRPC7 | 1    | MLRNS-----TFKNMQRHHTLREKGRRAIRGPAYMFNEKGTSLTPEEERFLDAAEYGNIPVVRKMLEE                                                                                                         | 65   |
| Human_TRPC1 | 8    | STDLS-----GASSSSLPSSPSSSSPN-----EVMALKDVRVEKEENTLNEKFLFLCKDGQYVMVKKILEE                                                                                                      | 69   |
| Human_TRPC4 | 7    | KRNVN-----APYRD-----RIPLR I -VRAESELSPSEKAYLNAVKEG DYASVKKSLLEE                                                                                                              | 54   |
| Human_TRPC5 | 7    | KKVNY-----SPYRD-----RIPLQ I -VRAETELSAEKAFLNAVKEG DYATVKQALQE                                                                                                                | 54   |
| Mouse_TRPC2 | 241  | IETLPQHAATCGESPQQPASPASLSSES SVLRHHVALTVP-PL--VPKQPWNTEI VNKKLFKFPPTLLRAIQEQLGLVQQLLES                                                                                       | 324  |
| Human_TRPC3 | 50   | SK---T LNVN-----CVDYMGQNALQ L VAGNEHLEVTELLK--KENLARIGDALLLAISKGYVRIVEAILNHGFAASKR                                                                                           | 120  |
| Human_TRPC6 | 121  | CH---S LNVN-----CVDYMGQNALQ L VAGNEHLEVTELLK--KENLSRVGDALLLAISKGYVRIVEAILNSHPAFAEGKR                                                                                         | 191  |
| Human_TRPC7 | 66   | SK---T LNFN-----CVDYMGQNALQ L VAGNEHLEVTELLK--KENLARVGDALLLAISKGYVRIVEAILNHGFAAQGR                                                                                           | 136  |
| Human_TRPC1 | 70   | NS-SGD L N I N-----CVDV LGRNAVIT I ENENLDI LQLLLDY---GCQSADALLVAIDSEVVGAVDILLNHRPKRSSRP                                                                                      | 140  |
| Human_TRPC4 | 55   | AEIYFKININ-----CIDPLGRSALLIAIENENLEIMELLNH---SVYVG DALLYAIRKEVVGAVELLNHHKPSGEKQ                                                                                              | 126  |
| Human_TRPC5 | 55   | AEIYVNVNIN-----CMDPLGRSALLIAIENENLEIMELLNH---SVYVG DALLYAIRKEVVGAVELLNHHKPSGEKQ                                                                                              | 126  |
| Mouse_TRPC2 | 325  | SS---DASGAGGGPLRNVEESEDRSWREALNLAIRLGHEVITDVL L ANVKFDFRQIHEALLVAVDTNQPAVVRLLARLEREKGR                                                                                       | 408  |
| Human_TRPC3 | 121  | LTLSPECEQLQDDDFYAYDEGTRFSPDITPI I LAAHCQKYEYVHMLLMKGAR I ERPHDYFCCKGDCMEKQRHDSFHSRSRINAYK                                                                                    | 207  |
| Human_TRPC6 | 192  | LATSPSQSEQLQDDDFYAYDEGTRFSDHVTPI I LAAHCQY EYIVHTLLRKGAR I ERPHDYFCCKNDCKNQKQKHSFHSRSRINAYK                                                                                  | 278  |
| Human_TRPC7 | 137  | LTLSPELEQLRDDDFYAYDEGTRFSDHITPI I LAAHCQY EYIVHLLKKGAR I ERPHDYFCCKNECTEKQRKDSFHSRSRINAYK                                                                                    | 223  |
| Human_TRPC1 | 141  | TIVKLME-----RIQNPEYSTTMDVAPV I LAAHRNNEY I LTMLLKQDVSLPKPHAVGCECTLCSAKNKKDSLHRSRFLDIYR                                                                                       | 218  |
| Human_TRPC4 | 127  | VPP-I L L-----DKQFS--EFTPDITPI I LAAHTNNEY I I KLLVQKGVSVPRPHEVRNCNCEVCSSSDVDSLHRSRSLNIYK                                                                                    | 201  |
| Human_TRPC5 | 127  | VPT-LMM-----DTQFS--EFTPDITPI I LAAHTNNEY I I KLLVQKGVSVPRPHEVRNCNCEVCSSSDVDSLHRSRSLNIYK                                                                                      | 201  |
| Mouse_TRPC2 | 409  | VD-----TKSFSLAFDSSIDGSRFAPGVITPTLACQKDYELIQLLMDQGHVTIARPHVSCALECNSNARYD L LKFLSLSRINTYR                                                                                      | 490  |
| Human_TRPC3 | 208  | GLASPAYLSLSSEDPVLTAL ELSNELAKLANIEKEFNNDYRKLSMOCKDFVVGVL D LCRDSEEV EAILNGDLESAEP-----LE                                                                                     | 286  |
| Human_TRPC6 | 279  | GLASPAYLSLSSEDPVMTAL ELSNELAVLANIEKEFNNDYKLSMOCKDFVVGVL D LCRNTEEV EAILNGDVTFLQ-----S                                                                                        | 355  |
| Human_TRPC7 | 224  | GLASAAVLSLSSEDPVLTAL ELSNELARLANIEFKNNDYRKLSMOCKDFVVGVL D LCRDTEEV EAILNGDVNFQV-----W                                                                                        | 300  |
| Human_TRPC1 | 219  | CLASPALIMLT EEDPILRAFELSADLKLSEVEFKNNDYELARQCKFAKADLLAQARNSRELEVINHTS SDEPLD-----KRG                                                                                         | 299  |
| Human_TRPC4 | 202  | ALASPSLIALSSEDPFLTAFLQSWELQELSKVNEFKSEYELSRQCKFAKADLLDQTRSSRELE I I LNRDNDNSL I-----                                                                                         | 278  |
| Human_TRPC5 | 202  | ALASPSLIALSSEDPILTAFRLGWELQELSKVNEFKSEYELSRQCKFAKADLLDQARSSRELE I I LNRDNDNSL I-----                                                                                         | 279  |
| Mouse_TRPC2 | 491  | G IASRAHLSLASEDAMLA FQLSRELRLRLARKEPEFKPQY I ALES L CQDYGFEL L GMCNRQSEVTA V LNDLGEDS ETEPEAGLGGA                                                                            | 577  |
| Human_TRPC3 | 287  | VHRHKASLSRVKLA I KYEVKKFVAHPNCQQQLTIWYENLSGLREQT I A I KCLVVLVVALGLPFLAIGYWIAPCSRLGKILRSPFMK                                                                                 | 373  |
| Human_TRPC6 | 356  | GDHGRPNLSRLKLA I KYEVKKFVAHPNCQQQLLSI WYENLSGLRQQTMAV KFLVVLAVAI GLPFLAL I YWFA PCSKMGKIMRGPFMK                                                                              | 442  |
| Human_TRPC7 | 301  | SDHHRPSLSRIKLA I KYEVKKFVAHPNCQQQLTMMWYENLSGLRQQT I AVKFLAVFGVSI GLPFLA I AYWIAPCSKLGRTLRSPFMK                                                                               | 387  |
| Human_TRPC1 | 300  | LEERMNLSRLKLA I KYNQKEFVSQSNQQQLNTVWFGQMSGYRRKPTCK I MTLVTVGI FWPVLSLCYLIAPKSQFGRI I HTPFMK                                                                                  | 386  |
| Human_TRPC4 | 279  | EEQSGNDLARKLKA I KYRQKEFVAQPNQQLLASRWYDEFPGWRRRHWA V KMTVCF I IGLLFPVFSVCYLIAPKSPLGLFLRKPF I K                                                                               | 365  |
| Human_TRPC5 | 280  | DPQKYHDLAKLKA I KYHQKEFVAQPNQQLLATLWYDGFPGWRRRHWA V KLLTMT I GFLFPLSIAYLISPRSNLGLFKKPF I K                                                                                   | 366  |
| Mouse_TRPC2 | 578  | FE EGP I N LARLRLAVN Y N Q K Q FVAHPI CQQV L S S I W C G N L A G W R G S T T I W K L F V A F L I F L T M P F L C I G Y W L A P K S Q L G R L L K I P V L K                   | 664  |
| Human_TRPC3 | 374  | FVAHAASFT I FLGLLVFNASDRFEGITTLPNITVTDYPKQ I FRVKTTQFTWTEMLIMVWV LGMWSECKELWLEGPREY I LQLWNV L                                                                               | 460  |
| Human_TRPC6 | 443  | FVAHAASFT I FLGLLVFNASDRFEGITTLPNETSTDNAKQLFRMKTSCFSWMEMLIISWV I GMIWAECKE I WTPGPKEVLELWNML                                                                                 | 529  |
| Human_TRPC7 | 388  | FVAHVSFT I FLGLLVFNASDRFEGVGTLPNETFTDYPKQ I FRVKTTQFTWTEMLIMVWV LGMWSECKE I WEGEPREY I LHLWN L                                                                               | 474  |
| Human_TRPC1 | 387  | F I I H G A S Y F T F L L L N L Y S L V Y N E D K K N-----T M G P A L E R I D Y L L I W I I G M I W S D I K R L W Y E G L E D F L E E S R N Q L                              | 458  |
| Human_TRPC4 | 366  | FICHTASYLTFLFLLLLASQHIDRSDLN-----VQGGPPT I VEWMI L P W V L G F I W G E I K Q M W D G G L Q D Y I H D W W N L M                                                               | 437  |
| Human_TRPC5 | 367  | FICHTASYLTFLFLLLLASQHIVRTDLN-----VQGGPPT I VEWMI L P W V L G F I W G E I K E M W D G G F T E Y I H D W W N L M                                                               | 438  |
| Mouse_TRPC2 | 665  | F L L H S A S Y L W F L I F L L G E S L V M-----E-----T Q L S T F -K G R S S V W V E T S L H M I W T G L W F E C K E W D I G E F S Y L L D W W N F L                         | 737  |
| Human_TRPC3 | 461  | D F G M L S I F I A A F T A R F L A F L Q A T K A Q Y V D S V Y Q E S D L S E V T L P P E I Q Y F -T Y A R D K W L P S D P Q I I S E G L Y A I A V V L S F S R I A Y I L P   | 546  |
| Human_TRPC6 | 530  | D F G M L A I F A A S F I A R F M A F W H A S K A Q S I I D A N D T L K D L T K V T L G D N V K Y Y -N L A R I K W D P S D P Q I I S E G L Y A I A V V L S F S R I A Y I L P | 615  |
| Human_TRPC7 | 475  | D F G M L S I F V A S F T A R F M A F L K A T E A Q L Y V D Q H V Q D D T L H N V S L P P E V A Y F -T Y A R D K W W P S D P Q I I S E G L Y A I A V V L S F S R I A Y I L P | 560  |
| Human_TRPC1 | 459  | S F V M N S L Y L A T F A L K V V A H N K-----F H D F A D R K D W A F H P T L V A E G L F A F A N V L S Y L R L F F M Y T                                                    | 518  |
| Human_TRPC4 | 438  | D F V M N S L Y L A T I S L K I V A Y V K-----Y S A L N P R E S W D M W H P T L V A E A L F A I A N I S S L R L I S L F T                                                    | 497  |
| Human_TRPC5 | 439  | D F A M N S L Y L A T I S L K I V A Y V K-----Y N G S R P R E E W E M W H P T L I A E A L F A I S N I L S S R L I S L F T                                                    | 498  |
| Mouse_TRPC2 | 738  | D V V I L S L Y L A S F A R L L L A G L A-----Y M H C R D-----A S D S T T C R Y F T T A E R S E W R T E D P Q F L A E V L F A V T S M L S F T R L A Y I L P                  | 812  |
| Human_TRPC3 | 547  | A N E S F G P L Q I S L G R T V K D I F K F M V I F I M V F A F M I G M F I L Y S Y Y L G A-----K V N A A F T T V E E S F K T L F W S I F G L S E                            | 618  |
| Human_TRPC6 | 516  | A N E S F G P L Q I S L G R T V K D I F K F M V I F I M V F A F M I G M F N L Y S Y Y I G A-----K Q N E A F T T V E E S F K T L F W A I F G L S E                            | 687  |
| Human_TRPC7 | 661  | A N E S F G P L Q I S L G R T V K D I F K F M V I F I M V F A F M I G M F N L Y S Y R G A-----K Y N P A F T T V E E S F K T L F W S I F G L S E                              | 632  |
| Human_TRPC1 | 519  | T S S I L G P L Q I S M G Q M L D Q F G K F L G M F L V L F S F T I G L T Q L Y D K -G Y T S K E Q K D C V G I F C E Q Q S N D T F H S F I G T C F A L F W Y I F S L A H     | 603  |
| Human_TRPC4 | 498  | A N S H L G P L Q I S L G R M L D I L K F L F I Y C L V L L A F A N G L N Q L Y F Y Y E T R A I D E P N N C K G I R C E K Q N N -A F S T L F E T L Q S L F W S Y F G L I -   | 579  |
| Human_TRPC5 | 499  | A N S H L G P L Q I S L G R M L D I L K F L F I Y C L V L L A F A N G L N Q L Y F Y Y E T R A I D E P N N C K G I R C E K Q N N -A F S T L F E T L Q S L F W S Y F G L L -   | 583  |
| Mouse_TRPC2 | 813  | A H E S L G T L Q I S I G K M I D D M I R F M F I L M I L T A F L C G L N N I Y V P Y Q E S-----E---K L G N F N E T F Q F L F W T M F G M E E                                | 881  |
| Human_TRPC3 | 619  | --VTSVVLKYDHHKFIENIGYVLYG I Y N V T M V V L L N M L I A M I N S S Y Q E I E D D S D V E W K F A R S K L W L S Y F D D G K T L P P P F S L V P S P K S                        | 703  |
| Human_TRPC6 | 698  | --VKSVYINYNHFIENIGYVLYG I Y N V T M V I V L L N M L I A M I N S S Y Q E I E D D A D V E W K F A R A K L W L S Y F E G R T L P V P F N L V P S P K S                          | 772  |
| Human_TRPC7 | 633  | --V I S V V L K Y D H K F I E N I G Y V L Y G V N V T M V V L L N M L I A M I N S S Y Q E I E D A D V E W K F A R A K L W L S Y F D E G R T L P A P F N L V P S P K S        | 717  |
| Human_TRPC1 | 604  | V A I F V T R F S Y G E L Q S F V G A V I G T Y N V V V I V L T K L L V A M L H K S F Q L I A N H E D K E W K F A R A K L W L S Y F D D K C T L P P P F N I I P S P K T      | 690  |
| Human_TRPC4 | 580  | -NLYVTNVKAKHEFTEFVGATMFGTYNVI S L V V L L N M L I A M M N S Y Q L I A D H A D I E W K F A R T K L W M S Y F E E G G T L P T P F N V I P S P K S                              | 665  |
| Human_TRPC5 | 584  | -NLYVTNVKAKHEFTEFVGATMFGTYNVI S L V V L L N M L I A M M N S Y Q L I A D H A D I E W K F A R T K L W M S Y F E E G G T L P P P F N I I P S P K S                              | 669  |
| Mouse_TRPC2 | 882  | --HTVVDN-PQLFVPEFVGGRAMYGIET I V M V I V L L N M L I A M I N S Y Q K I E D D A D V E W K F A R S K L Y L S Y F D E G T L P V P F N I L P S P K A                             | 965  |
| Human_TRPC3 | 704  | F V Y F I M R I V N---F P K C R R R R L Q K D I E M G M G N S K S R L N-----L F T Q S N S R V F S H S F N S I L N Q P T R Y Q Q I M                                          | 767  |
| Human_TRPC6 | 773  | L F Y L L L L K K K W I S E L F Q G H K K G F Q E D A E M N K I N E E K K L G I L G S H E D L S K L S L D K K Q V G H N K Q P S I R S S E D F H L N S F N N P P Q Y Q K I M  | 859  |
| Human_TRPC7 | 718  | F Y Y L I M R I K M C L I K L C K S A K S C E N D L E M G M L N S K F K T-----R Y Q -A G M R N S E N L T A N N T S K P T R Y Q K I M                                         | 784  |
| Human_TRPC1 | 691  | I C Y M I S S L S K W I C S H T S K G K V K R Q N S L K E-----W R N L K Q K R D E N Y Q K V M                                                                                | 735  |
| Human_TRPC4 | 666  | L W Y L I K W I W T H L C K K K M---R R K P E S F G T-----I G R-----R A A D N L R R H H Q Y Q E V M                                                                          | 710  |
| Human_TRPC5 | 670  | F L Y L G N W F N N T F C K R D P D G R R R R R N L S-----F T E-----R N A D S L I Q N Q H Y Q E V I                                                                          | 717  |
| Mouse_TRPC2 | 966  | A F Y L V R N I F R F L C G G S S C C A K K S D Y P P I-----G T F T N P G A R A G S A G E G E---R V S Y R L R V I                                                            | 1020 |
| Human_TRPC3 | 768  | K R L I K R Y V L K A Q V D K E N D E V---N E G E L K E I K Q D I S S L R Y E L L E-----D K S Q A T E E L A-----I L I H K L S E---K                                          | 827  |
| Human_TRPC6 | 860  | K R L I K R Y V L K A Q I D K E S D E V---N E G E L K E I K Q D I S S L R Y E L L E-----E K S Q N T E D L A-----E L I R E L G E---K                                          | 919  |
| Human_TRPC7 | 785  | K R L I K R Y V L K A Q V D R E N D E V---N E G E L K E I K Q D I S S L R Y E L L E-----E K S Q A T E L A-----D L I Q L S E---K                                              | 844  |
| Human_TRPC1 | 736  | C C L V H R Y L T S M R Q K M Q S T D Q -A T V E N L N E L R Q D L S K F R N E I R D L L G R S T K Y A M F Y P R N-----W R N L K Q K R D E N Y Q K V M                       | 793  |
| Human_TRPC4 | 711  | R N L V K R Y V A A M I R D A K T E E G -L T E E N F K E L K Q D I S S F R F E V L G L R G S K L S T I Q S A N A S K E S N S A D S D E K S D S E G N S K D K K N F S L       | 796  |
| Human_TRPC5 | 718  | R N L V K R Y V A A M I R N S K T H E G -L T E E N F K E L K Q D I S S F R F E V L D L L G N R K H P R S F S T S S T E L---S Q R D D N D G S G G A R A K S K S V S -         | 798  |
| Mouse_TRPC2 | 1021 | K A L V Q R Y I E T A R R E F E E T R R K D L G N R L T E L T K T V S R L Q S E V A S V Q K N L A A G G A P R P P D G A S I L---S-----R Y I T R V R N S F Q N                | 1096 |
| Human_TRPC3 | 828  | L N P S M L-----R C E-----                                                                                                                                                   | 836  |
| Human_TRPC6 | 920  | L S M E P N-----Q E E T N R-----                                                                                                                                             | 931  |
| Human_TRPC7 | 845  | F G K N L N-----K D H L R V N K G K D I-----                                                                                                                                 | 862  |
| Human_TRPC1 |      |                                                                                                                                                                              |      |
| Human_TRPC4 | 797  | F D L T T L I H P R S A A I A -S E R H N I S N G S A L V V Q E---P P-----R E K Q                                                                                             | 833  |
| Human_TRPC5 | 799  | F N L G C K-----K K T C H G A P L I R T M---P R S S G A Q G K S K A E S S                                                                                                    | 833  |
| Mouse_TRPC2 | 1097 | L G P P T S D T P A E L T M P G I V E T E V S L G D G L D G T G E A G A P A P G E P G S S S---                                                                               | 1143 |
