# Supplementary figures and images for: Structure of the human lipid-gated cation channel TRPC3
Source: eLife journal article supplement (doi:10.7554/elife.36852), 2018-05-04

Figure 1 – figure supplement 2

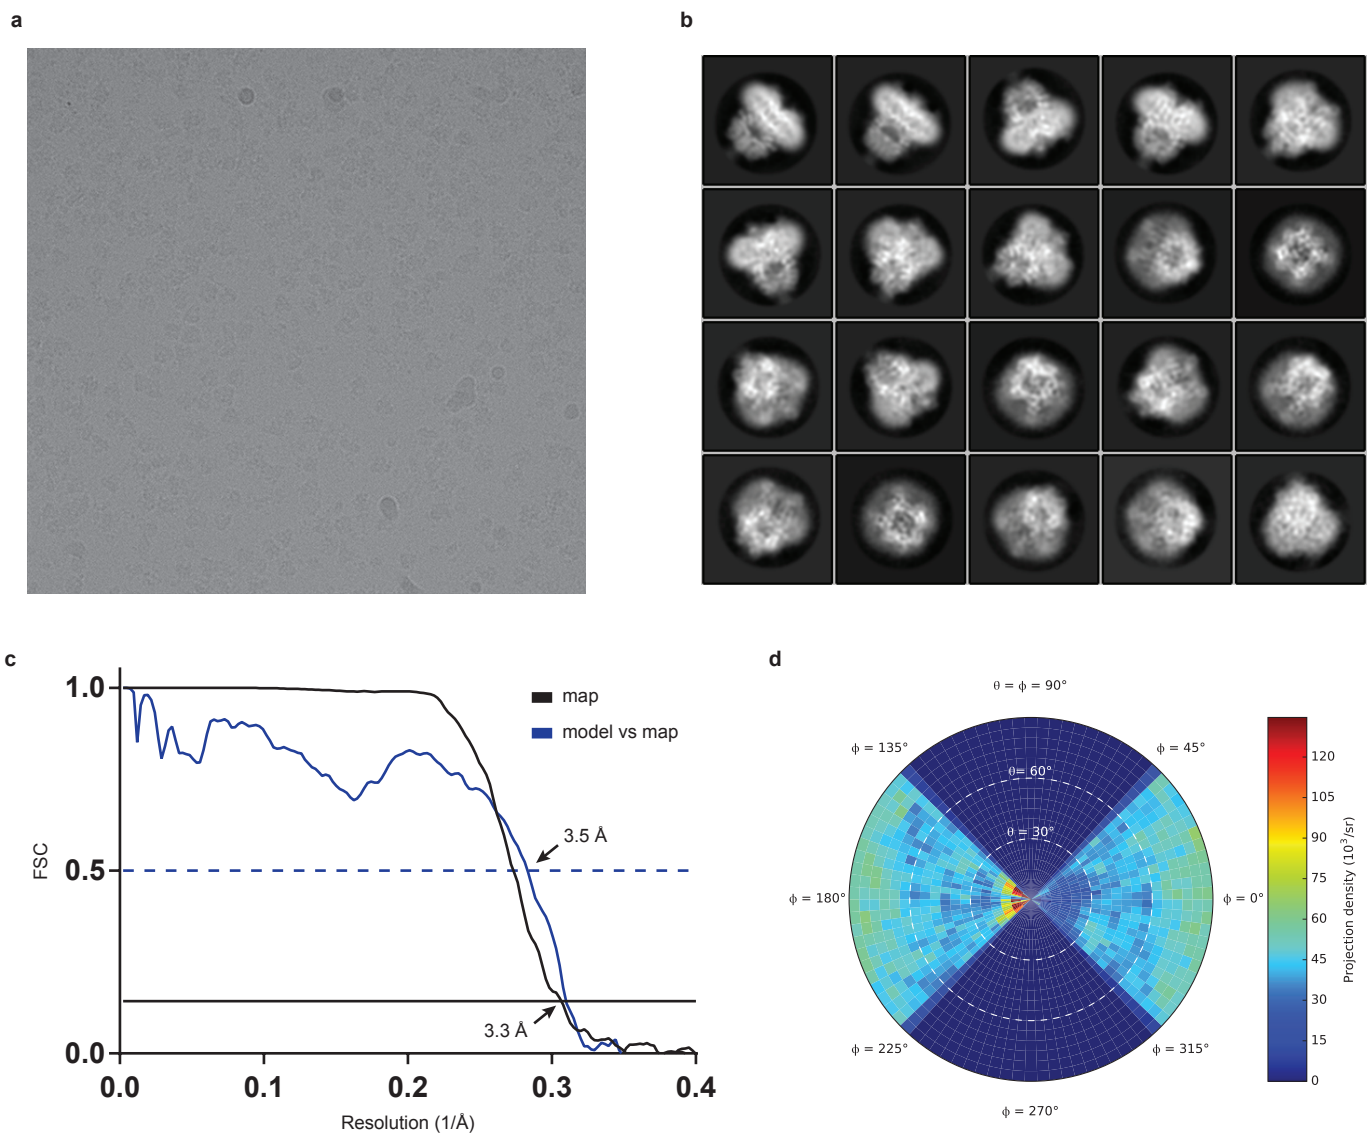

Supplement: supp [file elife-36852-supp-v1.zip]

Figure 1 – figure supplement 3

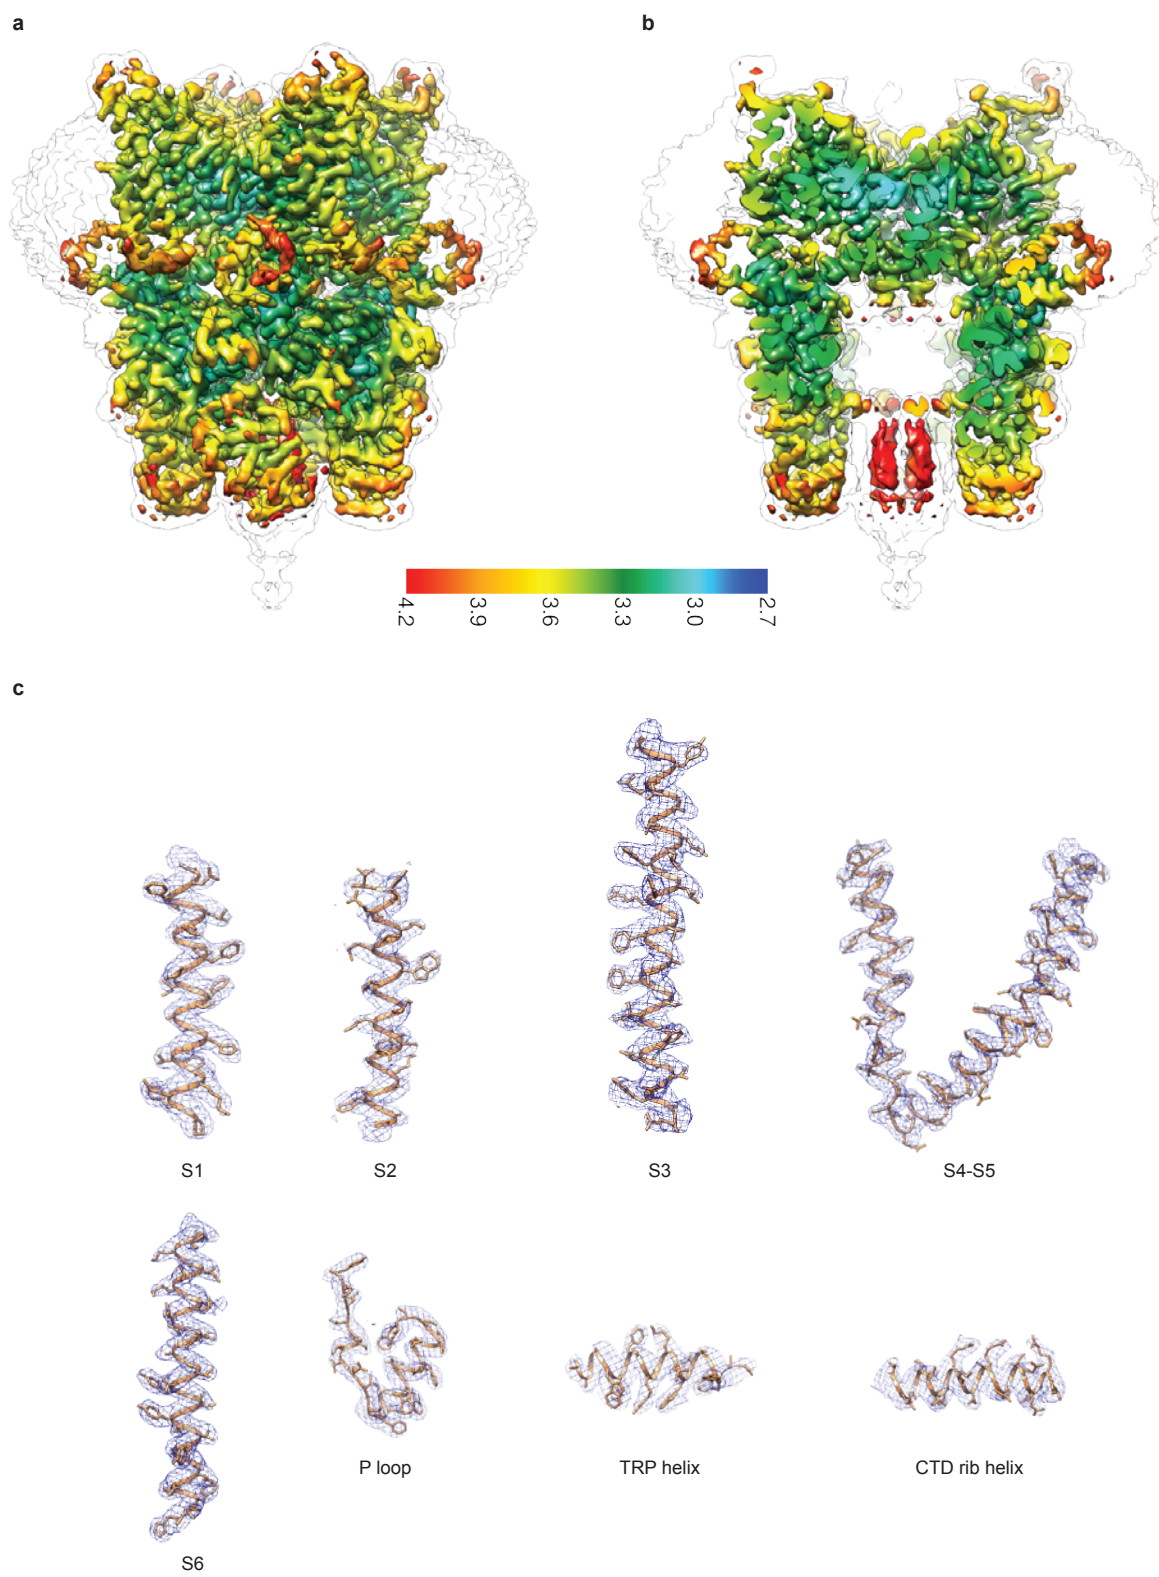

Supplement: supp [file elife-36852-supp-v1.zip]

Figure 3 – figure supplement 5

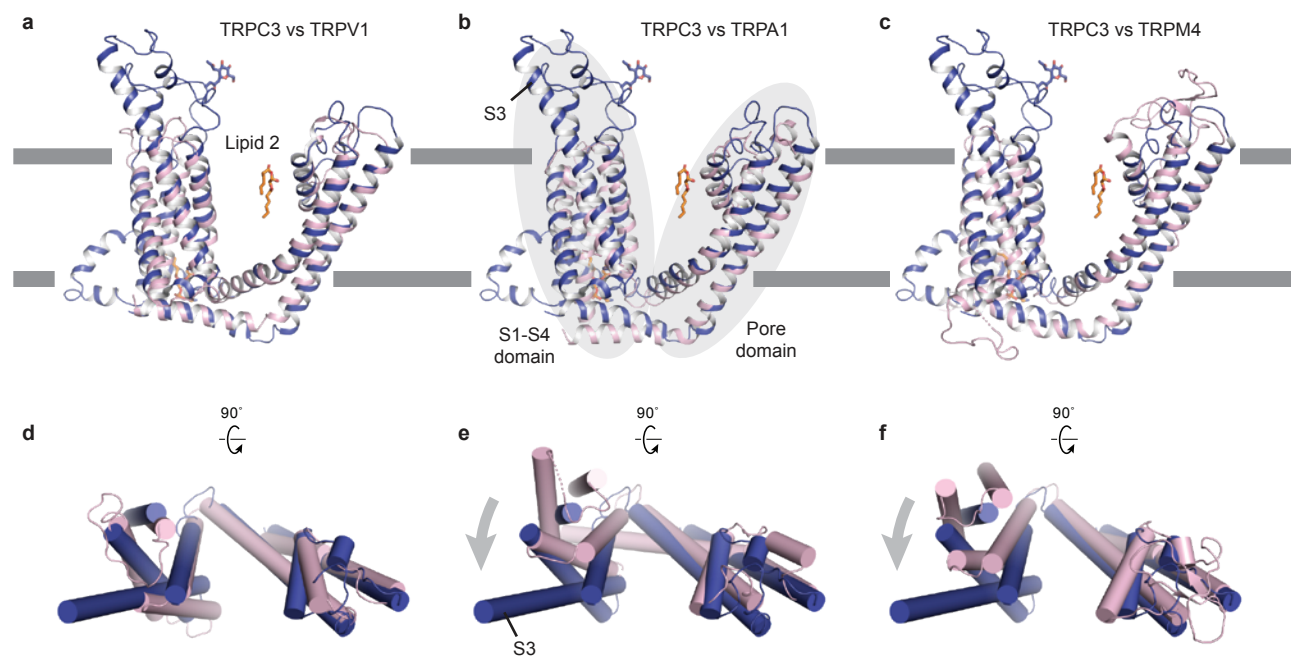

Supplement: supp [file elife-36852-supp-v1.zip]

Figure 1 – figure supplement 1

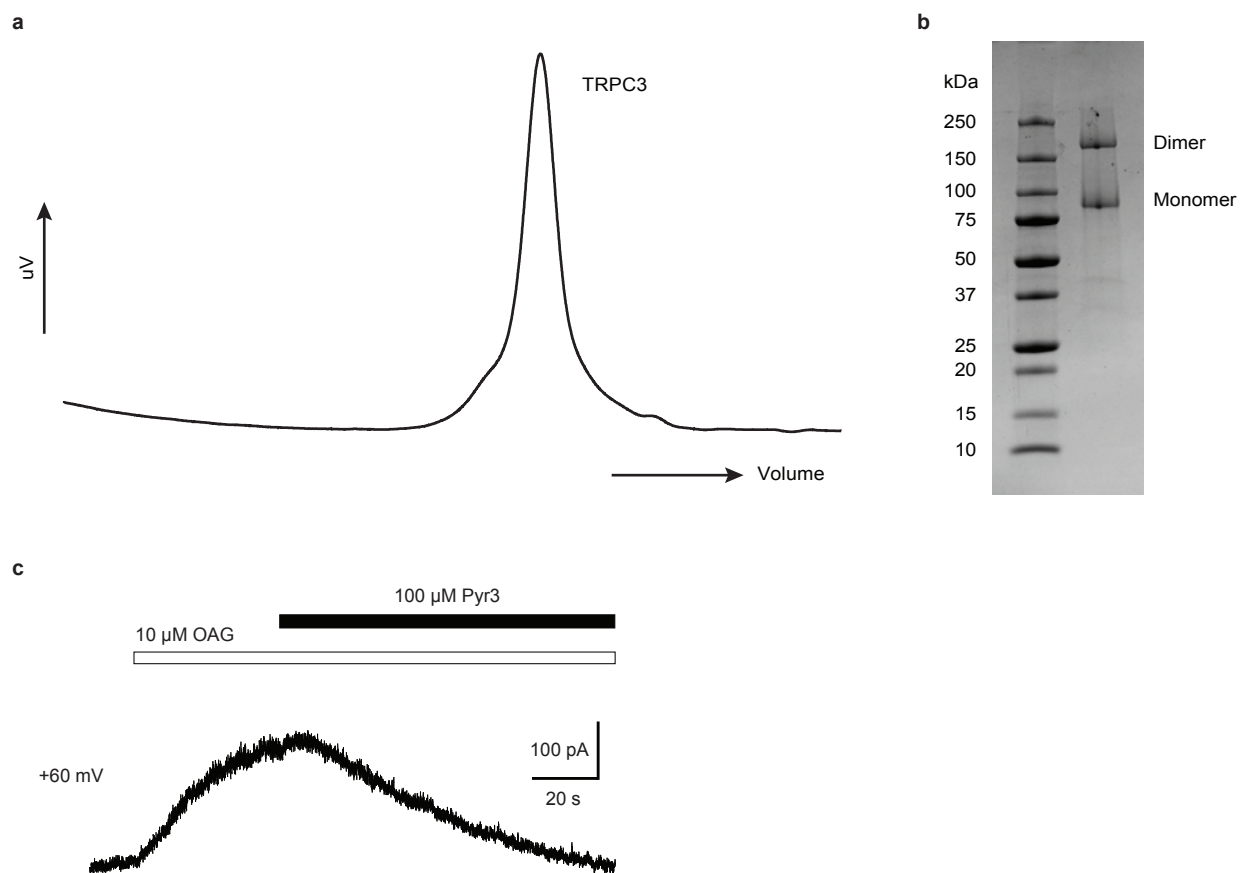

Supplement: supp [file elife-36852-supp-v1.zip › elife_poa_e36852_Figure_1_figure_supplement_1.pdf]
